# Supplementary material
Source: Elsevier journal article supplement (https://www.sciencedirect.com/science/article/pii/S1698698915000685)
Supplement: mmc1 [file S1698698915000685:mmc1.docx]

**MATERIALES SUPLEMENTARIOS DEL ARTÍCULO DE XXXXXXXX. “OBSTÁCULOS COMERCIALES Y SALARIALES A LA TRANSICIÓN NUTRICIONAL EN LA ESPAÑA DE COMIENZOS DEL SIGLO XX”[[1]](#footnote-1)**

**APÉNDICE A: Precios y salarios en Madrid y otras ciudades europeas en 1925.**

En este epígrafe utilizamos datos del año 1925 para comparar los precios de las subsistencias y la capacidad adquisitiva de los salarios de Madrid con los de una amplia muestra de ciudades del resto de Europa. Lo que se pretende es contrastar si los problemas señalados para los años anteriores a la Primera Guerra Mundial seguían vigentes a mediados de la década de 1920, y si las conclusiones alcanzadas comparando los precios de Gibraltar con los de las ciudades españolas siguen siendo válidas cuando la comparación se realiza con grandes ciudades del resto de Europa.

El problema de la comparación de precios entre ciudades de distintos países es que vienen expresados en distintas divisas con tipo de cambio inestables. Además, el significado de esos precios para los consumidores es muy dependiente de los niveles de ingresos a los que tienen acceso. Para soslayar estos problemas en los cuadros 1A y 2A las cifras representan las cantidades de los distintos productos (expresada en kilogramos, litros o lo que corresponda en cada caso) que se podrían comprar en cada ciudad dedicando todo el salario a adquirirlos. La relación salario/precio de cada producto será lógicamente tanto más favorable para el trabajador cuanto más cantidad de un mismo producto se pueda adquirir con el salario local.

Queda claro con una primera mirada a los dos cuadros que la relación salarios precios es bastante más favorable, casi para cualquier producto, en las cinco ciudades situadas a la derecha de ambos: Berlín, Ámsterdam, Oslo, Estocolmo y Londres. Y ello no solo respecto a Madrid, sino también respecto a cualquiera de las otras ocho ciudades consideradas. Es decir, en Madrid, y las demás ciudades de la Europa occidental y oriental observadas (Lisboa, Milán, París, Viena o Varsovia entre otras), el nivel de vida de la clase trabajadora se encontraba a una considerable distancia del de las ciudades inglesas, alemanas, holandesas y escandinavas consideradas[[2]](#footnote-2).

En ambos cuadros se han sombreado las cifras correspondientes a aquellos productos y ciudades en los que la capacidad adquisitiva de los salarios expresada en pan, tocino, patatas, o cualquiera de los demás productos considerados, es menor que en Madrid, quedando en blanco las cifras de todos los productos y ciudades con unos salarios con mayor capacidad de compra de cada mercancía que los de Madrid. Como se puede apreciar la mayor densidad de sombreado se sitúa en la mitad superior izquierda de ambos cuadros. En concreto, con los salarios medios de los albañiles o de los peones madrileños se podía adquirir en 1925 más pan blanco o harina de trigo que en la inmensa mayoría de las ciudades de Europa occidental y oriental continentales.

Como veíamos en la comparación con Gibraltar en los años 1909-13, el pan y la harina de trigo se podían comprar a unos precios en Gibraltar menos favorables o similares que en la mayoría de las ciudades españolas, incluidas las más próximas como Cádiz y Málaga. Ahora vemos que con los salarios de los peones y albañiles de Madrid se puede comprar más pan y harina que en muchas ciudades europeas. Si había problemas de acceso a los alimentos, o de carestía relativa de los alimentos en España, este no era el caso del pan de trigo y ni de su harina ni en 1909-1913, ni en 1925. Sin embargo, la dificultad relativa en Madrid respecto a casi todas las demás ciudades de acceder a la patata es algo que no había sido captado en la comparación con Gibraltar, quizá debido al pequeño comercio internacional de este producto, siendo a si su oferta dependiente de las circunstancias de cada país o región[[3]](#footnote-3). De todos modos, la carestía relativa de la patata en Madrid concuerda con la fuerte dispersión del precio de este tubérculo en las ciudades españolas en el periodo 1909-1913 (cuadro 2 del artículo). Esta dispersión nos remite a posibles problemas en la trabazón del mercado interior de este tubérculo, y quizá también en la organización de su distribución urbana.

Como en el caso de la comparación con Gibraltar, en la que precios de la carne y huevos eran más favorables que en la mayoría de las ciudades españolas, también nos encontramos que con el sueldo de los albañiles y peones de Madrid se puede adquirir en general menos carne de buey y de carnero, y también menos huevos, que en la mayoría de las ciudades de Europa occidental y oriental. Es decir, se constatan unas dificultades en el Madrid de 1925, y en general en las ciudades españolas en 1909-1913, para el acceso a la carne y a los derivados ganaderos. Dificultad que se acrecentaba por la falta de acceso a la carne congelada que, como se aprecia en los cuadros 1A y 2A, aumentaba considerablemente la capacidad adquisitiva de los salarios allí donde se comercializaba, dados sus más reducidos precios. El acceso a los coloniales también era menos viable en Madrid, particularmente en el caso del azúcar, la política de comercio exterior, y en concreto la intensa protección arancelaria, fueron los responsables de esta carestía diferencial de los coloniales en 1925 y anteriormente.

Tras este seguimiento de la capacidad adquisitiva de los salarios en productos concretos, pasamos a comparar las dietas completas que se pueden comprar en las distintas ciudades con sus precios y salarios locales (véase la última fila de los cuadros 1A y 2A). La dieta que se ha empleado para estos cálculos es la misma para todas las ciudades, y es la que utilizó el Instituto Internacional de Trabajo de Ginebra en 1929 para la elaboración de índices de salarios reales internacionales[[4]](#footnote-4).

Los resultados de estas comparaciones son demoledores. El número de dietas que se pueden adquirir con los salarios y precios de Madrid superan tan solo a Lisboa, Roma y Milán en el caso de los albañiles; en el caso de los peones únicamente a Lisboa y Milán. Este resultado se debe en parte a que los productos considerados, y la dieta homogéneas utilizada, son en extremo cárnicas y lácteas, sin considerar otros componentes de la dieta de origen vegetal y con precios más favorables en los mercados de las ciudades españolas.

Este negativo resultado para el nivel de vida de los asalariados madrileños, aunque exagerado, resalta la extrema dificultad de las familias españolas, respecto a otros países europeos, incluso de similares o inferiores niveles de desarrollo, de acceder a dietas más ricas en productos ganaderos. Tras estas dificultades se encontraban desde luego problemas ambientales que limitan la oferta interior de este tipo de productos[[5]](#footnote-5), pero también problemas de prioridades de la política económica a la hora de diseñar la política de comercio exterior o de abastos públicos. Los bajos niveles salariales fueron también, tanto en 1909-1913 como en 1925, responsables de estos resultados. Todo ello inducía tanto a dietas insuficientes para buena parte de la población, como, al menos hasta finales de la década de 1960, a sendas de transición nutricional diferenciadas respecto a países con mejores condiciones naturales para las producciones ganaderas.

|  | **Cuadro 1A. Capacidad adquisitiva del sueldo medio semanal de un ALBAÑIL en el año 1925: kilos (litros para la leche y unidades para los huevos) que se pueden adquirir de cada producto gastando todo el sueldo en su compra y número de dietas básicas semanales de un hombre adulto que se pueden comprar con el sueldo del albañil (Los cálculos se han realizado con los sueldos y precios expresados en sus respectiva monedas locales).** | | | | | | | | | | | | | | | | | | | | | | | | | | |
| --- | --- | --- | --- | --- | --- | --- | --- | --- | --- | --- | --- | --- | --- | --- | --- | --- | --- | --- | --- | --- | --- | --- | --- | --- | --- | --- | --- |
|  |
|  | Madrid | Lisboa | | Roma | | Milán | | París | | Bruselas | | Viena | | Praga | | Varsovia | | Berlín | | Ámsterdam | | Oslo | | Estocolmo | | Londres | |
| Pan blanco | **98** | 48 | | 74 | | 74 | | 106 | | 100 | | 47 | | 74 | | 60 | | 88 | | 145 | | 91 | | 89 | | 189 | |
| Pan moreno |  | 57 | |  | |  | |  | | 103 | | 110 | | 85 | | 116 | | 151 | | 187 | | 175 | | 112 | |  | |
| Harina de trigo | **112** | 31 | | 68 | | 64 | | 73 | | 74 | | 81 | | 61 | | 79 | | 112 | | 123 | | 136 | | 170 | | 166 | |
| Manteca fresca | **12** | 4 | | 9 | | 8 | | 10 | | 9 | | 10 | | 9 | | 11 | | 14 | | 15 | | 17 | |  | | 19 | |
| Manteca salada | **15** | 5 | | 20 | |  | |  | | 10 | | 26 | |  | |  | | 14 | |  | | 13 | | 20 | | 19 | |
| Margarina |  | 6 | | 13 | | 14 | | 23 | | 19 | | 26 | | 16 | |  | | 35 | | 32 | | 38 | | 44 | | 62 | |
| Costillas de buey | **14** | 10 | | 17 | | 12 | | 9 | | 11 | | 22 | | 14 | | 26 | | 24 | | 27 | | 21 | | 32 | | 25 | |
| Espaldilla de buey | **18** | 10 | | 21 | | 20 | | 22 | | 23 | | 21 | | 14 | | 26 | | 24 | | 35 | | 25 | | 42 | | 57 | |
| C. buey congelada |  |  | | 22 | | 21 | | 14 | | 17 | | 29 | |  | |  | | 39 | | 29 | |  | |  | | 41 | |
| E. buey congelada |  |  | | 47 | | 39 | | 46 | | 30 | | 29 | |  | |  | | 39 | | 43 | |  | |  | | 92 | |
| Pierna de Carnero | **14** | 13 | |  | | 15 | | 10 | | 12 | | 21 | | 17 | | 27 | | 22 | | 17 | | 24 | | 26 | | 24 | |
| Pecho de carnero | **23** | 13 | |  | | 17 | | 25 | | 25 | | 21 | | 17 | | 27 | | 26 | | 32 | | 26 | |  | | 56 | |
| Pi. Carnero congelada |  |  | |  | |  | | 16 | | 16 | |  | |  | |  | |  | |  | | 31 | |  | | 36 | |
| Pe. Carnero congelado |  |  | |  | |  | | 47 | | 33 | |  | |  | |  | |  | |  | | 31 | |  | | 89 | |
| Tocino | **16** | 11 | | 15 | | 14 | | 16 | | 14 | | 19 | |  | | 21 | | 18 | | 32 | | 18 | | 27 | | 25 | |
| Patatas | **207** | 170 | | 193 | | 208 | | 177 | | 284 | | 294 | | 239 | | 451 | | 641 | | 400 | | 285 | | 417 | | 336 | |
| Azúcar blanca | **37** | 36 | | 26 | | 26 | | 54 | | 71 | | 81 | | 46 | | 45 | | 81 | | 78 | | 96 | | 117 | | 131 | |
| Café | **8** | 10 | | 5 | | 5 | | 10 | | 11 | | 8 | | 5 | | 7 | | 8 | | 22 | | 17 | | 19 | |  | |
| Sustitutos de café |  |  | | 17 | | 14 | | 36 | |  | | 43 | | 51 | | 36 | | 109 | |  | |  | | 45 | |  | |
| Te | **3** | 5 | | 4 | |  | | 6 | | 8 | | 5 | |  | | 3 | | 6 | | 14 | |  | |  | | 23 | |
| Queso | **12** | 7 | | 10 | | 9 | | 12 | | 15 | | 11 | | 35 | | 35 | | 37 | | 24 | | 84 | | 44 | | 35 | |
| Leche sin nata | **75** | 46 | | 86 | | 107 | | 154 | | 135 | | 132 | | 99 | | 135 | | 186 | | 201 | | 197 | | 283 | | 198 | |
| Huevos | **266** | 226 | | 273 | | 256 | | 227 | | 273 | | 361 | | 277 | | 374 | | 412 | | 410 | | 467 | | 574 | | 571 | |
| Arroz | **58** | 38 | | 61 | | 67 | | 50 | | 54 | | 89 | | 55 | | 56 | | 86 | | 159 | | 76 | | 149 | | 164 | |
|  |  |  | |  | |  | |  | |  | |  | |  | |  | |  | |  | |  | |  | |  | |
| Sueldo albañil/ dieta media europea | **4,4** | 2,8 | | 4,4 | | 4,0 | | 4,9 | | 5,2 | | 5,4 | | 4,4 | | 5,2 | | 7,1 | | 8,4 | | 7,7 | | 9,2 | | 10,5 | |
|  | Fuente: Para precios y salarios: *Boletín oficial del Ministerio de Trabajo, Comercio e Industria*, 2ª época, números 13 al 18 (de julio de 1925 a enero de 1926) y 20 (marzo de 1926); Para la dieta: Boletín Oficial del Ministerio de Trabajo y Previsión, año 1, nº 7 (octubre 1929) p.19. | | | | | | | | | | | | | | | | | | | | | | | | | | |
|  |
|  | **Cuadro 2A. Capacidad adquisitiva del sueldo medio semanal de un PEÓN de la construcción en el año 1925: kilos (litros para la leche y unidades para los huevos) que se pueden adquirir de cada producto gastando todo el sueldo en su compra y número de dietas básicas semanales de un hombre adulto que se pueden comprar con el sueldo de un peón (Los cálculos se han realizado con los sueldos y precios expresados en sus respectiva monedas locales).** | | | | | | | | | | | | | | | | | | | | | | | | | | |
|  | Madrid | | Lisboa | | Roma | | Milán | | París | | Bruselas | | Viena | | Praga | | Varsovia | | Berlín | | Ámsterdam | | Oslo | | Estocolmo | | Londres |
| Pan blanco | **60** | | 43 | | 55 | | 48 | | 64 | | 71 | | 36 | | 55 | | 37 | | 68 | | 118 | | 89 | | 81 | | 145 |
| Pan moreno |  | | 51 | |  | |  | |  | | 73 | | 86 | | 63 | | 70 | | 116 | | 152 | | 170 | | 102 | |  |
| Harina de trigo | **69** | | 28 | | 50 | | 42 | | 44 | | 52 | | 63 | | 45 | | 48 | | 86 | | 100 | | 132 | | 154 | | 127 |
| Manteca fresca | **7** | | 4 | | 7 | | 5 | | 6 | | 6 | | 7 | | 6 | | 6 | | 10 | | 13 | | 17 | |  | | 15 |
| Manteca salada | **9** | | 4 | | 15 | |  | |  | | 7 | | 20 | |  | |  | | 11 | |  | | 13 | | 18 | | 15 |
| Margarina |  | | 5 | | 9 | | 9 | | 14 | | 14 | | 20 | | 12 | |  | | 27 | | 26 | | 37 | | 40 | | 48 |
| Costillas de buey | **9** | | 9 | | 13 | | 8 | | 5 | | 8 | | 17 | | 10 | | 15 | | 19 | | 22 | | 20 | | 29 | | 19 |
| Espaldilla de buey | **11** | | 9 | | 16 | | 13 | | 14 | | 16 | | 17 | | 10 | | 15 | | 18 | | 28 | | 24 | | 38 | | 43 |
| C. buey congelada |  | |  | | 16 | | 14 | | 8 | | 12 | | 22 | |  | |  | | 30 | | 23 | |  | |  | | 31 |
| E. buey congelada |  | |  | | 35 | | 26 | | 28 | | 21 | | 22 | |  | |  | | 30 | | 35 | |  | |  | | 71 |
| Pierna de Carnero | **9** | | 12 | |  | | 10 | | 6 | | 9 | | 16 | | 13 | | 16 | | 17 | | 14 | | 23 | | 24 | | 18 |
| Pecho de carnero | **14** | | 12 | |  | | 11 | | 15 | | 18 | | 16 | | 13 | | 16 | | 20 | | 26 | | 25 | |  | | 42 |
| Pi. Carnero congelada |  | |  | |  | |  | | 10 | | 11 | |  | |  | |  | |  | |  | | 30 | |  | | 28 |
| Pe. Carnero congelado |  | |  | |  | |  | | 29 | | 23 | |  | |  | |  | |  | |  | | 30 | |  | | 68 |
| Tocino | **10** | | 10 | | 11 | | 9 | | 10 | | 10 | | 15 | |  | | 13 | | 14 | | 26 | | 18 | | 25 | | 19 |
| Patatas | **127** | | 153 | | 142 | | 137 | | 108 | | 201 | | 228 | | 179 | | 273 | | 495 | | 325 | | 277 | | 378 | | 257 |
| Azúcar blanca | **23** | | 32 | | 19 | | 17 | | 33 | | 51 | | 63 | | 34 | | 27 | | 63 | | 63 | | 94 | | 106 | | 100 |
| Café | **5** | | 9 | | 4 | | 3 | | 6 | | 8 | | 7 | | 4 | | 4 | | 6 | | 17 | | 16 | | 17 | |  |
| Sustitutos de café |  | |  | | 13 | | 9 | | 22 | |  | | 33 | | 38 | | 22 | | 84 | |  | |  | | 41 | |  |
| Te | **2** | | 5 | | 3 | |  | | 4 | | 6 | | 4 | |  | | 2 | | 5 | | 11 | |  | |  | | 18 |
| Queso | **7** | | 6 | | 8 | | 6 | | 7 | | 11 | | 9 | | 26 | | 21 | | 29 | | 20 | | 82 | | 40 | | 27 |
| Leche sin nata | **46** | | 41 | | 63 | | 70 | | 94 | | 96 | | 102 | | 74 | | 82 | | 144 | | 163 | | 191 | | 256 | | 152 |
| Huevos | **164** | | 202 | | 201 | | 168 | | 138 | | 194 | | 280 | | 206 | | 226 | | 318 | | 333 | | 455 | | 521 | | 437 |
| Arroz | **35** | | 34 | | 45 | | 44 | | 31 | | 39 | | 69 | | 41 | | 34 | | 67 | | 129 | | 74 | | 135 | | 126 |
|  |  | |  | |  | |  | |  | |  | |  | |  | |  | |  | |  | |  | |  | |  |
| Sueldo peón/ dieta media europea | **2,7** | | 2,5 | | 3,2 | | 2,6 | | 3,0 | | 3,7 | | 4,2 | | 3,3 | | 3,2 | | 5,5 | | 6,8 | | 7,5 | | 8,3 | | 8,0 |
|  | Fuente: ídem cuadro 1A. | | | | | | | | | | | | | | | | | |  | |  | |  | |  | |  |
|  |  | |  | |  | |  | |  |

**APÉNDICE B: Datos básicos utilizados en el trabajo y sus fuentes.**

| **Cuadro 1B** |  |  |  |  |  |  |  |  |  |  |  |  |
| --- | --- | --- | --- | --- | --- | --- | --- | --- | --- | --- | --- | --- |
| **Precios corrientes al por menor de las ciudades españolas y Gibraltar (1909-1913). En kilogramos salvo en los casos de leche y vino (litros) y huevos (docena).** | | | | | | | | | | | | |
|  | **Gibraltar** | **Mínimo España** | **Mínimo España/ Gibraltar** | **Barcelona** | **Madrid** | **Valladolid** | **Bilbao** | **La Coruña** | **Zaragoza** | **Alicante** | **Cádiz** | **Málaga** |
| **Pan de trigo** | 0,46 | 0,35 | 0,35 | 0,43 | 0,39 | 0,38 | 0,41 | 0,47 | 0,35 | 0,39 | 0,38 | 0,36 |
| **Harina de trigo** | 0,37 | 0,35 | 0,35 | 0,39 | 0,41 | 0,35 | 0,39 | 0,49 | 0,38 | 0,45 | 0,37 | 0,39 |
| **Arroz** | 0,50 | 0,48 | 0,48 | 0,68 | 0,61 | 0,66 | 0,57 | 0,55 | 0,59 | 0,48 | 0,49 | 0,57 |
| **Patatas** | 0,22 | 0,12 | 0,12 | 0,18 | 0,15 | 0,16 | 0,14 | 0,12 | 0,12 | 0,19 | 0,16 | 0,21 |
| **Verdura fresca** | 0,45 | 0,13 | 0,13 | 0,23 | 0,33 | 0,23 | 0,26 | 0,14 | 0,13 | 0,22 | 0,17 | 0,20 |
| **Fruta fresca** | 0,33 | 0,20 | 0,20 | 0,62 | 0,62 | 0,49 | 0,43 | 0,28 | 0,20 | 0,27 | 0,26 | 0,26 |
| **Carne vacuno** | 1,39 | 1,46 | 1,39 | 2,11 | 1,46 | 1,91 | 1,49 | 1,48 | 1,48 | 2,11 | 2,04 | 2,50 |
| **Carne de lanar** | 1,24 | 1,16 | 1,16 | 2,21 | 1,69 | 1,43 | 1,16 | 1,26 | 1,85 | 2,21 | 1,41 | 1,58 |
| **Carne de cerdo** | 1,66 | 1,97 | 1,66 | 2,26 | 2,14 | 2,31 | 2,18 | 2,11 | 1,97 | 2,06 | 2,25 | 2,50 |
| **Pescado fresco** | 0,99 | 0,56 | 0,56 | 1,35 | 1,18 | 1,63 | 1,32 | 0,67 | 0,98 | 0,93 | 0,69 | 0,56 |
| **Huevos** | 0,98 | 1,12 | 0,98 | 1,49 | 1,12 | 1,41 | 1,39 | 1,18 | 1,17 | 1,44 | 1,18 | 1,61 |
| **Leche fresca** | 0,56 | 0,31 | 0,31 | 0,47 | 0,56 | 0,39 | 0,37 | 0,33 | 0,31 | 0,53 | 0,51 | 0,62 |
| **Azúcar** | 0,53 | 1,10 | 0,53 | 1,25 | 1,10 | 1,25 | 1,11 | 1,22 | 1,11 | 1,16 | 1,19 | 1,17 |
| **Sal** | 0,25 | 0,12 | 0,12 | 0,13 | 0,13 | 0,12 | 0,14 | 0,13 | 0,13 | 0,13 | 0,12 | 0,12 |
| **Café** | 3,01 | 4,47 | 3,01 | 5,03 | 4,50 | 5,31 | 4,53 | 4,47 | 5,72 | 4,85 | 4,50 | 4,78 |
| **Vino de pasto** | 0,75 | 0,27 | 0,27 | 0,31 | 0,31 | 0,37 | 0,62 | 0,52 | 0,27 | 0,34 | 0,48 | 0,46 |
|  |  |  |  |  |  |  |  |  |  |  |  |  |
| Fuentes: Gibraltar: *Gibralatar Chronocle and Official Gazette;* ciudades españolas*: Boletín de Instituto de Reformas Sociales.* | | | | | |  |  |  |  |  |  |  |
|  |  |  |  |  |  |  |

| **Cuadro 2B** |  |  |  |  |  |  |  |  |  |  |  |  |  |
| --- | --- | --- | --- | --- | --- | --- | --- | --- | --- | --- | --- | --- | --- |
| **Consumo por persona y año de los productos indicados en el periodo 1964-1965 (zonas urbanas). Unidades: kilogramos (en general), litros (leche y vino), docenas (huevos)** | | | | | | | | | | | | | |
|  | **España** | **Cataluña** | **Cantábrico** | **Galicia** | **Ebro** | **Levante** | **Castilla-León** | **Extremadura y Salamanca** | **Andalucía Occidental** | **Andalucía Oriental** | **Castilla la Mancha** | **Canarias** | **Madrid** |
| **Pan** | 121,5 | 108,6 | 123,0 | 125,1 | 108,3 | 143,4 | 109,3 | 114,5 | 130,0 | 133,2 | 158,6 | 64,4 | 111,4 |
| **Harina y sémola** | 4,2 | 3,1 | 3,3 | 2,9 | 1,6 | 3,0 | 2,7 | 2,5 | 4,5 | 9,1 | 2,6 | 22,5 | 3,2 |
| **Arroz** | 9,5 | 11,6 | 7,4 | 4,9 | 6,1 | 17,4 | 5,5 | 7,7 | 8,4 | 8,3 | 6,4 | 9,7 | 7,3 |
| **Patata** | 87,3 | 86,2 | 97,6 | 211,2 | 64,4 | 76,8 | 77,3 | 63,1 | 76,3 | 92,5 | 63,6 | 161,9 | 74,4 |
| **Verduras fresca** | 61,5 | 81,0 | 39,9 | 43,7 | 63,6 | 73,8 | 43,5 | 41,5 | 63,2 | 64,8 | 48,3 | 66,5 | 48,5 |
| **Frutas frescas** | 69,3 | 80,0 | 51,0 | 38,9 | 57,7 | 81,0 | 55,8 | 70,7 | 71,2 | 64,6 | 63,2 | 73,0 | 75,6 |
| **Carne vacuno** | 9,9 | 8,3 | 17,0 | 19,0 | 5,8 | 5,6 | 13,4 | 9,7 | 4,8 | 5,0 | 2,1 | 10,0 | 18,6 |
| **Carne lanar** | 4,8 | 7,4 | 1,4 | 1,0 | 14,6 | 6,4 | 6,0 | 5,1 | 2,2 | 2,5 | 8,5 | 0,1 | 3,8 |
| **Carne de cerdo** | 1,5 | 2,9 | 0,7 | 2,0 | 1,8 | 1,9 | 1,5 | 1,4 | 1,2 | 0,3 | 0,9 | 0,2 | 0,6 |
| **Pescado fresco** | 24,5 | 25,4 | 24,0 | 47,2 | 15,0 | 16,2 | 23,8 | 25,8 | 29,4 | 27,6 | 19,3 | 21,6 | 30,7 |
| **Huevos** | 20,6 | 18,4 | 23,8 | 18,8 | 28,2 | 18,9 | 26,1 | 21,8 | 19,9 | 21,4 | 14,2 | 17,3 | 22,8 |
| **Leche fresa** | 81,2 | 68,8 | 152,9 | 117,0 | 100,5 | 35,2 | 108,1 | 99,2 | 52,2 | 59,1 | 59,4 | 78,9 | 111,1 |
| **Azúcar** | 13,9 | 11,1 | 17,5 | 18,3 | 14,8 | 13,4 | 13,1 | 16,2 | 15,6 | 15,8 | 9,1 | 25,8 | 10,2 |
| **Sal** | 3,70 | 4,76 | 5,00 | 2,58 | 2,65 | 4,29 | 3,02 | 3,95 | 2,23 | 3,31 | 2,80 | 6,11 | 3,07 |
| **Café** | 1,65 | 1,90 | 1,92 | 1,72 | 1,23 | 1,16 | 0,89 | 2,52 | 2,04 | 0,87 | 0,50 | 5,21 | 1,34 |
| **Vino de pasto** | 41,1 | 57,5 | 68,4 | 60,1 | 52,5 | 38,7 | 55,7 | 19,8 | 11,0 | 21,5 | 36,5 | 7,6 | 42,3 |
|  |  |  |  |  |  |  |  |  |  |  |  |  |  |
|  | Fuente: *Encuesta de presupuestos familiares. Marzo 1964-Marzo 1965*, Instituto Nacional de Estadística, Madrid, 1965 (España urbana pp. 20-22; consumos urbanos en las regiones pp. 25-27, en todos los casos consumo más autoconsumo). | | | | | | | |  |  |  |  |  |
|  |  |  |  |  |  |

|  |  |  |  |  |  |  |  |  |  |  |  |  |  |  |
| --- | --- | --- | --- | --- | --- | --- | --- | --- | --- | --- | --- | --- | --- | --- |
|  | **Cuadro 3B. Composición de la dietas en calorías en el periodo 1964-1965 (zonas urbanas). Las líneas sombreadas corresponden a los productos considerados, al conjunto de calorías que implican y a su peso porcentual en el conjunto de la dieta.** | | | | | | | | | | | | | |
|  |  | **España** | **Cataluña** | **Cantábrico** | **Galicia** | **Ebro** | **Levante** | **Castilla-León** | **Extremadura y Salamanca** | **Andalucía Occidental** | **Andalucía Oriental** | **Castilla la Mancha** | **Canarias** | **Madrid** |
|  | Pan | 865 | 774 | 876 | 891 | 771 | 1.021 | 779 | 816 | 926 | 949 | 1.130 | 459 | 794 |
|  | Harina y sémola | 42 | 31 | 33 | 29 | 16 | 30 | 27 | 25 | 45 | 91 | 26 | 225 | 32 |
|  | Arroz | 94 | 114 | 73 | 48 | 60 | 172 | 54 | 76 | 83 | 82 | 63 | 96 | 72 |
|  | **Total cereales** | **1.103** | **1.016** | **1.091** | **1.020** | **961** | **1.332** | **976** | **1.167** | **1.134** | **1.209** | **1.309** | **911** | **1.017** |
|  | Patata | 167 | 165 | 187 | 405 | 123 | 147 | 148 | 121 | 146 | 177 | 122 | 310 | 143 |
|  | Verduras fresca | 38 | 48 | 26 | 27 | 41 | 46 | 25 | 25 | 37 | 39 | 30 | 43 | 30 |
|  | Legumbres | 132 | 103 | 200 | 98 | 75 | 109 | 129 | 190 | 171 | 118 | 125 | 124 | 132 |
|  | Frutas frescas | 80 | 93 | 65 | 52 | 66 | 93 | 68 | 69 | 70 | 72 | 63 | 121 | 92 |
|  | **Total hortalizas, legumbres y frutas** | **433** | **428** | **496** | **591** | **321** | **419** | **386** | **416** | **433** | **421** | **350** | **620** | **411** |
|  | Carne vacuno | 48 | 37 | 84 | 78 | 24 | 23 | 67 | 43 | 24 | 23 | 10 | 57 | 100 |
|  | Carne lanar | 31 | 49 | 9 | 6 | 96 | 42 | 39 | 33 | 14 | 17 | 56 | 0 | 25 |
|  | Carne de cerdo | 16 | 31 | 8 | 21 | 19 | 21 | 16 | 15 | 13 | 3 | 10 | 2 | 7 |
|  | Pescado fresco | 38 | 38 | 51 | 53 | 23 | 20 | 41 | 40 | 46 | 63 | 32 | 12 | 52 |
|  | Huevos | 35 | 31 | 41 | 32 | 48 | 32 | 45 | 37 | 34 | 37 | 24 | 29 | 39 |
|  | Leche fresa | 134 | 113 | 252 | 193 | 165 | 58 | 178 | 163 | 86 | 97 | 98 | 130 | 183 |
|  | **Total animales** | **488** | **551** | **596** | **463** | **551** | **454** | **535** | **493** | **340** | **367** | **367** | **437** | **602** |
|  | Aceite | 555 | 570 | 560 | 526 | 541 | 578 | 482 | 573 | 593 | 625 | 501 | 455 | 500 |
|  | Otras grasas | 72 | 44 | 60 | 52 | 31 | 38 | 103 | 158 | 146 | 68 | 140 | 48 | 52 |
|  | **Total grasas** | **626** | **613** | **620** | **578** | **573** | **616** | **585** | **731** | **739** | **693** | **641** | **503** | **552** |
|  | Azúcar | 147 | 118 | 186 | 193 | 157 | 142 | 139 | 172 | 165 | 167 | 97 | 273 | 108 |
|  | Chocolate | 31 | 32 | 44 | 24 | 33 | 37 | 38 | 30 | 28 | 23 | 35 | 10 | 28 |
|  | Vino de pasto | 87 | 121 | 144 | 127 | 111 | 82 | 117 | 42 | 23 | 45 | 77 | 16 | 89 |
| **Total complementarios** | | **318** | **321** | **634** | **358** | **328** | **318** | **316** | **263** | **222** | **252** | **217** | **316** | **237** |
|  | **Total General** | **2.968** | **2.929** | **3.437** | **3.010** | **2.733** | **3.139** | **2.798** | **3.069** | **2.869** | **2.942** | **2.885** | **2.787** | **2.819** |
|  | **Muestra** | **1.823** | **1.763** | **2.034** | **2.157** | **1.722** | **1.930** | **1.743** | **1.678** | **1.713** | **1.862** | **1.838** | **1.773** | **1.765** |
|  | **% muestra** | **61** | **60** | **59** | **72** | **63** | **61** | **62** | **55** | **60** | **63** | **64** | **64** | **63** |
|  |  | Fuentes: para el consumo de alimentos ídem apéndice 2B. Para el cálculo de las calorías Moreiras, Carbajal y Cabrera, 1996. | | | | | | | | | |  |  |  |

| **Cuadro 4B. Salarios medios masculinos de varios sectores productivos de obreros cualificados y peones*. Varias ciudades en 1914.** | | | | | | | | | |
| --- | --- | --- | --- | --- | --- | --- | --- | --- | --- |
|
|
|  | Salario hora pesetas | | III Horas semanales trabajadas | Salario Semanal | | Ingreso diario | | Índice ingreso diario (100=media) | |
|  | I Obrero cualificado | II Peón | IV=I*III Obrero cualificado | V=II*III Peón | VI=IV/7 Obrero cualificado | VII=V/7 Peón | VIII Obrero cualificado | IX Peón |
| Barcelona | 0,576 | 0,390 | 57,9 | 33,4 | 22,6 | 4,77 | 3,23 | 112 | 112 |
| Madrid | 0,496 | 0,402 | 57,8 | 28,6 | 23,2 | 4,09 | 3,32 | 96 | 115 |
| Valladolid | 0,457 | 0,256 | 59,5 | 27,2 | 15,2 | 3,88 | 2,17 | 91 | 76 |
| Bilbao | 0,462 | 0,346 | 59,7 | 27,6 | 20,6 | 3,94 | 2,95 | 93 | 103 |
| La Coruña | 0,528 | 0,354 | 58,5 | 30,9 | 20,7 | 4,41 | 2,96 | 104 | 103 |
| Zaragoza | 0,476 | 0,317 | 60,0 | 28,6 | 19,0 | 4,08 | 2,71 | 96 | 94 |
| Alicante | 0,484 | 0,298 | 58,9 | 28,5 | 17,5 | 4,07 | 2,51 | 96 | 87 |
| Cádiz | 0,557 | 0,321 | 59,0 | 32,9 | 19,0 | 4,70 | 2,71 | 111 | 94 |
| Málaga | 0,506 | 0,389 | 59,8 | 30,2 | 23,3 | 4,32 | 3,32 | 102 | 116 |
| Media | 0,505 | 0,341 | 59,0 | 29,8 | 20,1 | 4,25 | 2,87 | 100 | 100 |
| (*) Se han considerado para la realización de los promedios los siguientes sectores: metalurgia, hierro y metales, química, textil, construcción, alimentación, vestido, madera y transporte. El promedio se ha realizado ponderado el salario hora por el número de trabajadores de cada sector en cada capital de provincia (en Barcelona los datos se refieren al conjunto de su partido judicial; en Alicante y Cádiz además de los datos de la capital se incluyen los de Alcoy y La Línea respectivamente). Para pasar del salario hora al semanal se ha multiplicado por el promedio de horas trabajadas en cada provincia a la semana. Los datos presentados en las columnas VI y VII son el resultado de dividir los ingresos semanales entre siete. Fuente: Ministerio de Trabajo, Comercio e Industria, 1927: 12-63 y 151 | | | | | | | | | |
|
|
|
|
|

**Fuentes de los apéndices:**

Los **precios de Gibraltar** se han tomado del *Gibraltar Chronicle and Official Gazette*. En este periódico se publican semanalmente los precios a los que se venden al por menor una amplia muestra de alimentos. Los precios vienen en pesetas, pues en esta moneda era en la que se realizaban los intercambios en el mercado minorista de la ciudad. Se han promediado los precios de la primera semana de cada mes entre abril de 1909 y septiembre de 1913, ambos inclusive. El resultado es el que se presenta en la columna correspondiente a Gibraltar en Cuadro 1B del apéndice B. Se ha utilizado el precio mínimo del intervalo que se señala para los precios de cada productos (por ejemplo, pork de 0.80 a 1.20, se ha utilizado el 0.80). Tanto los meses elegidos como el hecho de utilizar los precios mínimos tienen como objetivo que la serie de Gibraltar sea homogénea con la de las ciudades españolas. En aras de esta misma homogeneidad se han promediado los precios de las frutas y hortalizas, pues mientras en Gibraltar se indican los precios de los productos concretos (apples, bananas, pears… o carrots, cabbages, onions…) en el caso de la fuente española se da un precio medio genérico para frutas y otro para hortalizas[[6]](#footnote-6).

Los **precios de las ciudades españolas** proceden de los publicados en el *Boletín del Instituto de Reformas Sociales*. En concreto de las medias semestrales que van de abril a septiembre de 1909, hasta abril y septiembre de 2013. Para obtener los precios medios se han promediado para cada ciudad y producto los correspondientes a los nueve semestres indicados. Los precios utilizados han sido los corrientes mínimos suministrados por las juntas locales para las siguientes ciudades[[7]](#footnote-7): Barcelona, Madrid, Valladolid, Bilbao, La Coruña, Zaragoza, Alicante, Cádiz y Málaga y se reproducen en las columnas correspondientes del apéndice uno.

Estos precios son resultado de un interrogatorio, primero trimestral y desde abril de 1909 semestral, remitido desde Madrid al Presidente de la Junta de Reformas Sociales de cada capital de provincia para que lo cumplimentaran. En él se preguntaba sobre “los precios corrientes de algunos artículos de primera necesidad para el consumo del obrero”[[8]](#footnote-8).

Los **salarios de 1914** proceden de las *Estadística de los salarios y jornadas de trabajo referida al período 1914-1925*, editadas por el Ministerio de Trabajo, Comercio e Industria en 1927. Los datos pueden consultarse en el Cuadro 4B del apéndice B, como se verá allí son resultado de promediar para cada capital de provincia los correspondientes a nueve sectores (la media se calcula ponderando los salarios de cada actividad por su correspondiente número de trabajadores).

Como **dieta objetivo** se ha elegido la estimada en la *Encuesta de Presupuestos Familiares (Marzo1964-Marzo 1965)* para la España urbana y para sus distintas regiones, atribuyendo a cada ciudad considerada la dieta urbana del área en la que está incluida (cuadros 2B y 3B del apéndice B). Se analiza para cada ciudad el coste de adquirir la dieta 1964-1965 a los precios corrientes en 1909-1913 en cada una de ellas y a los correspondientes precios mínimos que marcan las posibilidades de abaratamiento de cada producto (cuadro 4 del texto). Se relacionan a su vez estos costes con los salarios corrientes de cada ciudad en 1914, calculando el número de dietas diarias que se pueden comprar con él según cuales sean los precios utilizados (cuadro 5 del texto). Se mostrará así como se vería afectada la capacidad de los salarios de comienzos de siglo XX de comprar la dieta correspondiente a 1964-1965. Será este el momento de evaluar los factores comerciales y salariales que dificultaban a comienzos del siglo XX el acceso a unas dietas más completas y equilibradas.

**Los precios de Madrid y los de varias ciudades europeas en 1925** proceden del Instituto Internacional del Trabajo de Ginebra y fue publicada en el *Boletín oficial del Ministerio de Trabajo, Comercio e Industria* en sus números 13 al 18 y 20. En concreto se trata de precios medios mensuales al por menor de productos alimenticios en una amplia muestra de ciudades y expresados en sus respectivas monedas nacionales. Los meses considerados y promediados son los siete que van entre mayo y noviembre de 1925. Su principal problema es que no aparece ninguna información sobre frutas y verduras, es decir, se presentan precios de cereales, patatas, coloniales y una amplia muestra de derivados ganaderos.

La información complementaria sobre salarios que se ofrece junto a los cuadros de precios, también en las monedas correspondientes a cada país, permite efectuar una comparación de la capacidad adquisitiva de los salarios en las distintas ciudades evitando el engorroso asunto de los tipos de cambio. Con estos materiales se han calculado, en los cuadros 1A y 2A del apéndice A, la capacidad adquisitiva de los salarios para cada producto y ciudad, así como para el conjunto de la dieta. Para el cálculo del coste de la dieta se utiliza una dieta internacional elaborada también en el Instituto Internacional del Trabajo de Ginebra con el objetivo de elaborar índices internacionales de salarios reales. Se publicó en el *Boletín Oficial del Ministerio de Trabajo y Previsión*, año 1, nº 7, octubre de 1929, p. 19.

**BIBLIOGRAFÍA:**

Aparicio Chávarri, Gema, 2000. *El comercio mundial de alimentos y materias primas agrícolas entre 1900 y 1938*, Tesis doctoral inédita presentada en el Departamento de Estructura e Historia Económica y Economía Pública de la Universidad de Zaragoza.

González de Molina, M.; Soto, D.; Infante, J. y Aguilera, E., 2013. “¿Una o varias transiciones? Nuevos datos sobre el consumo alimentario en España (1900-2000)”, *XIV Congreso Internacional de Historia Agraria*, Badajoz, Universidad de Extremadura.

<http://seha.info/congresos/articulos/C.1.%20Gonz%C3%A1lez%20de%20Molina%20y%20otros.pdf>

Ministerio de Trabajo, Comercio e Industria, 1927. *Estadística de los salarios y jornadas de trabajo referida al periodo 1914-1925*, Madrid.

Moreiras, Olga; Carbajal, Ángeles. y Cabrera, Luisa, 1996. *Tablas de composición de los alimentos*, Madrid, Ediciones Pirámide.

1. Cítese como XXXXXXXXXX. “Obstáculos comerciales y salariales a la transición nutricional en la España del siglo XX”. Investigaciones de Historia Económica-Economic History Research, XXX, (X), pp. XXX-XXX. [↑](#footnote-ref-1)
2. La capacidad adquisitiva de los salarios aún resultaba considerablemente mayor que en Londres en ciudades como Otawa y Filadelfia. Cálculo efectuado con las mismas fuentes del cuadro 1A. [↑](#footnote-ref-2)
3. El peso en valor del comercio internacional de las patatas en el comercio agrario total fue del 0.49% en 1909-1913 y del 0.44% en 1924-1929 (Aparicio Chávarri, 2000: 553). [↑](#footnote-ref-3)
4. Dieta homogénea del Instituto Internacional de Trabajo (en kilogramos por semana salvo que se indiquen otras unidades) utilizada en los cuadros 1A y 2A para 1925 : 1,5 de pan blanco; 1 de pan moreno; 0,8 de harina de trigo; 0.25 de manteca; 0.1 de margarina; 0.85 de carne; 0,15 de tocino; 2,02 de patatas; 0,45 de azúcar blanca; 0,04 de café; 0,01 de sustitutos de café; 0,07 de té; 0,09 de queso; 2,4 litros de leche sin nata; 3,5 huevos, unidades; 0,2 arroz. Para la localización de la fuente véase cuadro 1A. [↑](#footnote-ref-4)
5. En el contexto de la agricultura mediterránea española quizá pudieron darse contradicciones entre la expansión de la producción agrícola y el crecimiento de las producciones ganaderas, lo que pudo afectar tanto a los precios relativos de estos productos como a las prácticas alimentarias (González de Molina, Soto, Infante y Aguilera, 2013). [↑](#footnote-ref-5)
6. Además, los precios del *Gibraltar Chronicle* muestran rasgos de calidad: reflejan, por ejemplo, una estacionalidad peculiar y coherente con cada producto. [↑](#footnote-ref-6)
7. La estadística distingue entre precio corriente y precio corriente máximo, es decir, los denominados tan solo “corrientes” son de hecho los corrientes mínimos. También utiliza en otros momentos el concepto de “precio más frecuente” o el de “encarecimiento” sobre el precio corriente. La Información más continua y amplia es la suministrada para los precios corrientes mínimos. [↑](#footnote-ref-7)
8. El primer interrogatorio utilizado puede encontrase en el número de Julio de 1904 (año I, número 1) del *Boletín del Instituto de Reformas Sociales*, en las páginas 36 a 37. [↑](#footnote-ref-8)
